# Supplementary material
Source: PubMed Central journal article supplement (PMC1820975)
Supplement: plntcell_tpc.106.048124_2.pdf [file plntcell_tpc.106.048124_2.pdf]

## Supplemental Figures 2

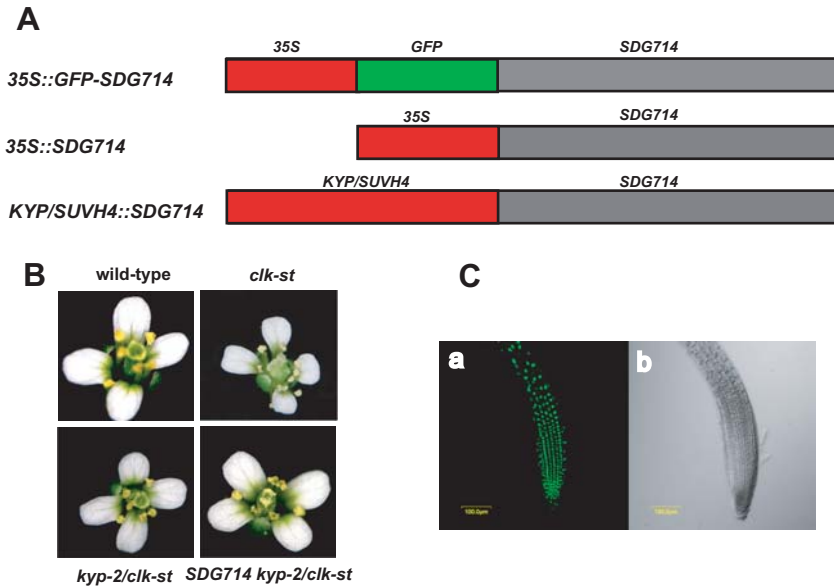

Supplemental Figures 2. Complementary analysis of *clk-st/kyp-2* with *SDG714*.

**A**, Diagrams represent *SDG714* driven by different promoters.

Promoters were presented as red boxes, GFP as green box and *SDG714* as grey boxes listed above.

**B**, Phenotypic analysis of stamen number in different plants.

There were ten stamens in *clk-st* background and six stamens in *SUVH4/KYP* defective background (*kyp-2/clk-st*) and wild-type control. Six stamens were observed in plants (*kyp-2/clk-st*) expressing of *SDG714*.

**C**, Analysis of *GFP-SDG714* expression in *kyp-2/clk-st* background.

Roots tip cells of plants (*kyp-2/clk-st*) over-expressing of *GFP-SDG714* (a, b) were observed by confocal microscope (left panel) and bright field was shown in right panel. *GFP-SDG714* showed spotty distribution in the nucleus.
